# Supplementary material for: Expression profiling in HcrVf2-transformed apple plants in response to Venturia inaequalis
Source: Springer Nature journal article supplement (doi:10.1007/s11295-008-0177-6), 2008-09-01
Supplement: MOESM2 [file 11295_2008_177_MOESM2_ESM.xls]

## Sheet: Foglio1
	Supplementary Table 1. List of the 334 unigenes identified by SSH and similar to known genes available in public databases. 264 clones were derived from the ‘forward’ subtraction, 59 from the ‘reverse’ and 11 from both the procedures.
	User_Id 1	EST lentgh 2	GenBank_Accn 3	Contig Name 4	N 5	ID of matching sequence 6	Best E-value 7 (BLASTX)	Source of matching sequence 8	Best matching sequence from database 9
		FORWARD SUBTRACTION
		Cell growth and division
	Md0457	720	FE969400	Contig 103	2	ABB86253	4e-109	S. tuberosum	3'-5' exonuclease domain-containing protein-like
	Md0394	507	FE969401	Contig 143	1	BAB20975	2e-40	M. domestica	gibberellin 20-oxidase
	Md0087	347	FE969402	Contig 261	1	BAB63707	4e-31	O. sativa	putative G10 protein
	Md0855	360	FE969403	Contig 397	1	AAU03366	3e-33	L. esculentum	histidine triad family protein
	Md0122	595	FE969404	S_Contig 190	5	AAW49257	9e-32	A. thaliana	Abl interactor-like protein-2
	Md1146	620	FE969405	S_Contig 65	2	BAE71303	9e-89	T. pratense	putative RuvB DNA helicase-like protein
		Cell structure
	Md0483	722	FE969406	Contig 115	2	AAR84297	3e-86	C. osmophloeum	UDP-glucose dehydrogenase
	Md0499	368	FE969407	Contig 148	2	ABE86373	7e-47	M. truncatula	glycoside hydrolase, family 1
	Md0181	213	FE969408	Contig 248	1	BAD91081	2e-31	P. pyrifolia	beta-D-galactosidase
	Md0107	393	FE969409	Contig 249	1	BAF42040	1e-34	P. communis	pectin methylesterase 3
	Md0626	332	FE969410	Contig 349	3	BAE99023	8e-45	A. thaliana	tubulin alpha-2/alpha-4 chain
	Md0840	526	FE969411	Contig 513	1	AAK30204	3e-33	D. carota	endoxyloglucan transferase
	Md0593	643	FE969412	Contig 59	3	ABE85996	5e-41	M. truncatula	glycoside hydrolase, family 1
	Md0539	487	FE969413	Contig 597	1	AAX37336	2e-48	P. tomentosa	UDP-glucuronic acid decarboxylase 3
	Md0528	614	FE969414	S_Contig 3	15	CAA47635	2e-137	P. dulcis	actin-related protein 9
	Md0501 Md0848	703 711	FE969415 FE969416	S_Contig 50	3	NP_199163	3e-46	A. thaliana	alpha-L-arabinofuranosidase / beta-D-xylosidase
	Md1014	364	FE969417	S_Contig 63	2	BAD98523	2e-111	P. pyrifolia	alpha-L-arabinofuranosidase / beta-D-xylosidase
	Md1414	941	FE969418	S_Contig 134	2	AAT42190	1e-20	N. tabacum	alpha-tubulin
		Disease/Defense
	Md0141	701	FE969419	Contig 100	2	AAL30426	1e-91	P. persica	beta-1,3-glucanase (PR-2)
	Md0195	570	FE969420	Contig 113	1	ABE81934	4e-17	M. truncatula	Kunitz inhibitor ST1-like (PR-6)
	Md0020	644	FE969421	Contig 128	6	AAQ72788	4e-114	C. sativus	hypersensitive-induced response protein
	Md0176	375	FE969422	Contig 183	1	BAB63915	2e-31	A. thaliana	early-responsive to dehydration putative membrane protein
	Md0008	390	FE969423	Contig 203	1	AAZ57445	1e-30	P. deltoides	lipoxygenase LOX2
	Md0495	406	FE969424	Contig 219	1	BAA88985	3e-13	N. tabacum	Ntdin
	Md1428	293	FE969425	Contig 220	2	BAB33421	6e-43	P. sativum	putative senescence-associated protein
	Md0144	291	FE969426	Contig 245	1	AAW65103	2e-16	P. salicina	polyphenol oxidase
	Md0860	708	FE969427	Contig 309	1	CAB56850	3e-77	P. persica	catalase
	Md1038 Md0981	725 700	FE969428 FE969429	Contig 319	4	BAD10818	2e-107	O. sativa	putative MA3 domain-containing protein
	Md1105	623	FE969430	Contig 357	2	ABC47923	4e-78	M. domestica	pathogenesis-related protein 5
	Md0600 Md0999	590 728	FE969431 FE969432	Contig 362	2	AAM62411	8e-58	N. tabacum	EDS1
	Md1108	585	FE969433	Contig 402	1	XP_464644	6e-23	O. sativa	putative protein kinase Xa21
	Md0891	414	FE969434	Contig 453	1	AAL85480	2e-21	P. persica	defensin protein 1 (PR-12)
	Md1115	491	FE969435	Contig 468	1	ABK34453	4e-47	S. oleracea	SP I mismatch endonuclease
	Md1028	596	FE969436	Contig 510	1	ABF47216	7e-67	N. benthamiana	cathepsin B
	Md1129	396	FE969437	Contig 512	1	AAK15070	1e-42	P. guajava	fatty acid hydroperoxide lyase
	Md0951	736	FE969438	Contig 539	1	AAR86686	4e-28	G. max	proline dehydrogenase
	Md0970	432	FE969439	Contig 558	1	CAH59427	1e-38	P. major	ascorbate peroxidase
	Md1054	734	FE969440	Contig 560	1	AAQ23899	7e-117	N. tabacum	RSH2
	Md0615	539	FE969441	Contig 582	1	CAA07232	1e-33	C. arietinum	putative Pi starvation-induced protein
	Md0263	615	FE969442	Contig 66	1	AAS00053	4e-83	M. domestica	clone 1n Mal d 1-like
	Md1364	473	FE969443	Contig 78	12	BAB64929	1e-28	P. pyrifolia	defensin-like protein
	Md0180 Md0749	663 531	FE969444 FE969445	Contig 88	3	CAB56850	2e-90	P. persica	catalase
	Md0439	717	FE969446	Contig 95	1	AAY54606	2e-41	N. benthamiana	NRG1 disease resistance protein (CC-NBS-LRR class)
	Md0210	299	FE969447	Contig 97	1	ABI35910	3e-30	R. australe	glutathione reductase
	Md1120	528	FE969953	S_Contig 100B	4	AAC23697	2e-30	M. domestica	metallothionein-like protein
	Md0783	567	FE969954	S_Contig 11	3	AAQ15278	4e-41	P. pyrifolia	class III endo-chitinase (PR-8)
	Md0247	651	FE969955	S_Contig 132	4	P46440	3e-69	N. tabacum	glutathione S-transferase APIC (GST class-phi)
		Energy
	Md0509	590	FE969448	Contig 131	1	BAB44155	2e-95	B. gymnorrhiza	hydroxypyruvate reductase
	Md0518	419	FE969449	Contig 149	1	NP_172537	1e-33	A. thaliana	succinyl-CoA synthetase, beta subunit
	Md0482	477	FE969450	Contig 161	1	ABA86963	6e-62	G. max	glyceraldehyde-3-phosphate dehydrogenase A subunit
	Md0110	412	FE969451	Contig 174	1	P26320	6e-50	O. sativa	oxygen-evolving enhancer protein 1, chloroplast precursor (OEE1)
	Md0152	330	FE969452	Contig 175	1	AAP55675	2e-12	P. persica	geranylgeranyl reductase
	Md0565	338	FE969453	Contig 197	1	P13869	5e-29	P. hybrida	chlorophyll a-b binding protein, chloroplast precursor (LHCI type II CAB)
	Md0566	391	FE969454	Contig 208	1	ABE86406	2e-35	M. truncatula	thioredoxin domain 2; Thioredoxin fold
	Md0175	480	FE969455	Contig 224	1	ABN49455	3e-61	P. sativum	photosystem I chlorophyll a/b binding protein
	Md0516	304	FE969456	Contig 238	3	ABI63587	1e-47	B. rapa	geranylgeranyl reductase
	Md0084 Md0963	743 699	FE969457 FE969458	Contig 29	10	ABE84701	1e-151	M. truncatula	alcohol dehydrogenase superfamily, zinc-containing
	Md0838	436	FE969459	Contig 333	3	CAA87068	7e-42	C. sinensis	non-photosynthetic ferredoxin
	Md0899	582	FE969460	Contig 359	2	BAF00366	5e-42	A. thaliana	PSI type III chlorophyll a/b-binding protein
	Md0246	556	FE969461	Contig 38	2	CAC80373	4e-75	C. annuum	glyceraldehyde-3-phosphate dehydrogenase
	Md1074	203	FE969462	Contig 384	2	CAA57409	7e-28	P. abies	light harvesting chlorophyll a /b-binding protein Lhcb1*2-2
	Md0403	712	FE969463	Contig 39	2	AAC24582	1e-129	P. armeniaca	zeaxanthin epoxidase
	Md0597 Md0811	387 525	FE969464 FE969465	Contig 392	2	AAU29200	8e-51	L. esculentum	glyoxisomal malate dehydrogenase
	Md0834	609	FE969466	Contig 433	1	CAA05025	2e-84	A. thaliana	succinate dehydrogenase flavoprotein alpha subunit
	Md1067	446	FE969467	Contig 476	1	CAA78901	2e-37	P. sylvestris	Lhca4 protein,Type 4 protein of light-harvesting complex of photosystem I
	Md0874	580	FE969468	Contig 536	1	CAF28586	4e-09	N. alba	petN
	Md0791	514	FE969469	Contig 564	1	NP_189420	2e-39	A. thaliana	disulfide oxidoreductase/ oxidoreductase
	Md1122	732	FE969470	Contig 570	1	ABN09825	1e-76	M. truncatula	thioredoxin domain 2
	Md0433	747	FE969471	Contig 58	1	CAA58230	2e-81	P. hybrida	triosephosphate isomerase, cytosolic (TIM)
	Md0498	721	FE969472	Contig 74	1	AAA34030	5e-119	S. oleracea	peroxisomal (S)-2-hydroxy-acid oxidase (Glycolate oxidase) (GOX)
	Md1043 Md0204	724 700	FE969473 FE969474	S_Contig 101	2	AAB99757	3e-90	M. sativa	malate dehydrogenase precursor
	Md0196 Md1053 Md1062	523 729 527	FE969475 FE969476 FE969477	S_Contig 120	3	ABE83768	1e-23	M. truncatula	photosystem I reaction centre subunit N
	Md1031	324	FE969478	S_Contig 156	2	AAA33866	2e-39	M. domestica	ribulose 1,5-bisphosphate carboxylase small subunit
	Md0651 Md0538	255 206	FE969479 FE969480	S_Contig 212	3	AAD27880	9e-26	V. radiata	photosystem I reaction center subunit III
	Md0542	317	FE969481	S_Contig 215	3	AAL13084	2e-31	P. avium	putative aconitase
	Md1142 Md0965	396 560	FE969482 FE969483	S_Contig 216	5	AAC34983	4e-97	P. persica	light harvesting chlorophyll A/B binding protein
	Md0967	415	FE969484	S_Contig 67	2	BAA03104	2e-54	L. sativa	light-harvesting chlorophyll a/b-binding protein (LHCP) precursor
		Intracellular traffic
	Md0473	736	FE969485	Contig 101	1	ABE85367	2e-62	M. truncatula	SecY protein; ABC transporter related
	Md0550	651	FE969486	Contig 114	2	AAA79356	1e-69	H. vulgare	signal recognition particle 54 kDa subunit
	Md0138	384	FE969487	Contig 181	1	NP_181525	9e-50	A. thaliana	microsomal signal peptidase 25 kDa subunit
	Md0511	328	FE969488	Contig 255	2	AAF13086	3e-38	A. thaliana	putative coated vesicle membrane protein
	Md0630	437	FE969489	Contig 342	3	ABB77236	7e-57	C. pepo	patellin 1
	Md1072	689	FE969490	Contig 484	1	ABE81090	3e-60	M. truncatula	zinc finger, RanBP2-type
	Md0270	571	FE969491	Contig 68	1	ABD28395	3e-50	M. truncatula	nucleoporin interacting component; Protein prenyltransferase
	Md1386	643	FE969492	S_Contig 160	8	ABE78982	3e-81	M. truncatula	Ras small GTPase, Rab type
	Md1139	616	FE969493	S_Contig 66	2	ABE87751	3e-63	M. truncatula	Ras GTPase; ARF/SAR superfamily
		Metabolism
	Md1424	619	FE969494	Contig 116	32	BAA10929	2e-56	N. tabacum	cytochrome P450 like_TBP
	Md0133	670	FE969495	Contig 119	1	CAJ32461	6e-65	N. tabacum	putative chloroplast cysteine synthase 1 precursor
	Md0416	535	FE969496	Contig 151	1	CAA90941	6e-33	A. thaliana	uridine diphosphate glucose epimerase
	Md0183	686	FE969497	Contig 167	1	NP_974931	7e-74	A. thaliana	catalytic/ hydrolase/ phosphoglycolate phosphatase
	Md0266	663	FE969498	Contig 19	1	ABE89542	8e-77	M. truncatula	acyl-CoA dehydrogenase
	Md0235	345	FE969499	Contig 194	1	NP_188991	3e-20	A. thaliana	cyanate hydratase
	Md0456	489	FE969500	Contig 205	1	ABE90597	2e-43	M. truncatula	CMP/dCMP deaminase, zinc-binding
	Md0497	306	FE969501	Contig 232	1	NP_191530	2e-24	A. thaliana	short-chain dehydrogenase/reductase (SDR) family protein
	Md0533	684	FE969502	Contig 25	2	AAW33813	5e-96	M. domestica	sorbitol dehydrogenase
	Md0182	190	FE969503	Contig 253	1	AAY21813	7e-20	G. max	tyrosine aminotransferase
	Md0647	634	FE969504	Contig 310	1	AAL66194	1e-96	P. communis	cytochrome P450
	Md0475	741	FE969505	Contig 34	5	AAF27052	5e-72	A. thaliana	F4N2.2
	Md1144	223	FE969506	Contig 348	3	CAC03680	4e-33	A. thaliana	branched-chain amino acid transaminase 5
	Md0978	628	FE969507	Contig 364	2	AAD38148	2e-44	P. armeniaca	beta-amylase
	Md0877	310	FE969508	Contig 376	2	ABA00460	5e-50	S. polyrrhiza	serine-glyoxylate aminotransferase
	Md0936	680	FE969509	Contig 414	1	CAI30145	6e-69	M. truncatula	glycosyltransferase
	Md0818	734	FE969510	Contig 446	1	AAK15259	2e-88	P. balsamifera	NADPH-cytochrome P450 oxydoreductase isoform 1
	Md0259	729	FE969511	Contig 45	1	BAB62566	6e-86	O. sativa	putative lysophospholipase 2
	Md1147	173	FE969512	Contig 464	1	CAB45873	3e-12	L. esculentum	beta-alanine synthase
	Md0594	708	FE969513	Contig 499	1	CAA50401	6e-92	G. max	coproporphyrinogen III oxidase, chloroplast precursor
	Md1052	743	FE969514	Contig 516	1	BAB63893	2e-36	O. sativa	putative tetrafunctional protein of glyoxysomal fatty acid beta-oxidation
	Md1098	520	FE969515	Contig 571	1	AAN52740	1e-56	O. sativa	putative trehalose-6-phosphate synthase
	Md1045	679	FE969516	Contig 574	1	ABC69422	4e-44	N. tabacum	cytochrome P450
	Md0864	254	FE969517	Contig 587	1	AAT58731	2e-27	O. sativa	putative phosphatidylserine synthase
	Md0508	735	FE969518	Contig 64	2	AAK63012	1,00E-41	L. esculentum	heme oxygenase 1
	Md0922	731	FE969519	S_Contig 1	5	AAR06294	3e-92	N. tabacum	adenylosuccinate synthase
	Md0090	625	FE969520	S_Contig 195	6	AAZ05071	2e-66	C. sinensis	cytochrome P450
	Md0880	731	FE969521	S_Contig 196	3	BAF00118	3e-94	A. thaliana	CTP synthase like protein
	Md0901	743	FE969522	S_Contig 6	2	CAB16844	7e-42	A. thaliana	serine C-palmitoyltransferase like protein
		Protein destination and storage
	Md0094	504	FE969523	Contig 136	1	ABE93622	2e-28	M. truncatula	AAA ATPase
	Md0448	371	FE969524	Contig 173	1	ABA98280	1e-08	O. sativa	ubiquitin-specific protease 12, putative
	Md0504	380	FE969525	Contig 186	1	NP_197475	8e-30	A. thaliana	dipeptidase
	Md0405	474	FE969526	Contig 188	1	BAE99743	2e-12	A. thaliana	putative presenilin
	Md0414	345	FE969527	Contig 209	1	ABE83893	3e-28	M. truncatula	20S proteasome, A and B subunits
	Md0184	409	FE969528	Contig 225	1	NM_124369	7e-56	A. thaliana	cpHSC70-2 (heat shock protein 70-7)
	Md0167	389	FE969529	Contig 236	1	AAD15443	5e-47	A. thaliana	putative DnaJ protein
	Md0506	184	FE969530	Contig 252	1	AAN05420	5e-13	P. canescens	putative RING protein
	Md0873	489	FE969531	Contig 275	1	BAD15902	2e-18	O. sativa	putative nicastrin
	Md1081 Md0797	686 723	FE969532 FE969533	Contig 301	8	BAE98915	2e-27	A. thaliana	ubiquitin carboxyl-terminal hydrolase like protein
	Md0279	692	FE969534	Contig 33	4	AAU90306	4e-56	S. tuberosum	putative CAAX amino terminal protease family protein
	Md0934	467	FE969535	Contig 378	2	CAD29822	2e-52	P. canadensis	putative serine protease
	Md0784	446	FE969536	Contig 388	2	BAD27799	2e-11	O. sativa	chaperone protein dnaJ-related-like
	Md0824	743	FE969537	Contig 399	1	AAS15800	8e-19	G. max	heat shock factor protein hsf8-related
	Md0948	403	FE969538	Contig 431	1	NP_197938	1e-58	A. thaliana	protein binding / ubiquitin-protein ligase/ zinc ion binding
	Md0869	642	FE969539	Contig 435	1	AAF73016	4e-10	A. marina	ubiquitin conjugating protein
	Md0984	620	FE969540	Contig 445	1	AAF04147	1e-74	H. brasiliensis	ubiquitin precursor
	Md0162 Md0225	441 480	FE969541 FE969542	Contig 46	2	ABE93439	1e-36	M. truncatula	SKP1 component
	Md1099	495	FE969543	Contig 466	1	AAT77954	8e-65	S. tuberosum	aspartic protease precursor-like
	Md0627	733	FE969544	Contig 491	1	NP_564592	7e-77	A. thaliana	ubiquitin-protein ligase
	Md0819	602	FE969545	Contig 501	1	Q8LG98	4e-22	A. thaliana	ubiquitin thioesterase otubain-like protein
	Md0845	740	FE969546	Contig 503	1	ABE77697	6e-129	M. truncatula	AAA ATPase
	Md0785	409	FE969547	Contig 519	1	NP_850306	4e-23	A. thaliana	protein binding / ubiquitin-protein ligase/ zinc ion binding
	Md1100	691	FE969548	Contig 525	1	BAB09730	2e-43	A. thaliana	26S proteasome regulatory particle chain RPT6-like protein
	Md0976	688	FE969549	Contig 526	1	ABE91558	2e-56	M. truncatula	proteasome component region PCI
	Md1051	728	FE969550	Contig 548	1	NP_181336	1e-100	A. thaliana	DnaJ-class molecular chaperone
	Md0822	308	FE969551	Contig 565	1	Q9ZQX6	5e-36	A. thaliana	ETO1-like protein 1
	Md0613	654	FE969552	Contig 586	1	ABE87963	1e-61	M. truncatula	MATH domain, putative
	Md0093	739	FE969553	Contig 72	1	ABE94713	2e-77	M. truncatula	peptidase M16A, coenzyme PQQ biosynthesis protein PqqF
	Md0966	446	FE969554	S_Contig 125	2	AAR83891	1e-64	C. annuum	ubiquitin-conjugating enzyme 8
	Md0940	354	FE969555	S_Contig 150	2	ABC24972	3e-09	L. esculentum	EIN3-binding F-box protein 2
	Md0464	284	FE969556	S_Contig 210	3	AAC34120	4e-34	A. thaliana	19S proteosome subunit 9
		Protein synthesis
	Md0288 Md1033	682 668	FE969557 FE969558	Contig 1	35	NP_849604	1e-11	A. thaliana	RPL4; structural constituent of ribosome
	Md0118	552	FE969559	Contig 132	1	NP_177984	5e-74	A. thaliana	structural constituent of ribosome
	Md0494	484	FE969560	Contig 154	1	AAG13986	3e-16	P. avium	60S ribosomal protein L24
	Md0510	350	FE969561	Contig 199	2	CAA80684	8e-45	A. thaliana	ribosomal protein S18A
	Md0163	462	FE969562	Contig 211	1	NP_174601	1e-45	A. thaliana	translation release factor
	Md0056	255	FE969563	Contig 237	3	BAB10063	6e-22	A. thaliana	60S ribosomal protein L13
	Md0028	161	FE969564	Contig 250	1	NP_564438	3e-09	A. thaliana	pseudouridylate synthase/ tRNA-pseudouridine synthase
	Md1093	435	FE969565	Contig 271	1	AAD03501	4e-21	A. marina	40S ribosome protein S7
	Md0780	638	FE969566	Contig 295	1	ABE88774	1e-75	M. truncatula	translation factor; Elongation factor G, III and V
	Md0959	742	FE969567	Contig 307	1	AAM47995	7e-97	A. thaliana	glutamate-tRNA ligase
	Md0941	725	FE969568	Contig 327	3	ABE81469	3e-118	M. truncatula	elongation factor Tu, domain 2
	Md0863	742	FE969569	Contig 428	1	P93111	1e-60	C. sativus	glutamyl-tRNA reductase 1, chloroplast precursor (EC 1.2.1.-) (GluTR)
	Md1104	704	FE969570	Contig 439	1	CAA70084	1e-61	N. plumbaginifolia	40S ribosomal protein S5
	Md0466	750	FE969571	Contig 47	1	YP_588155	7e-31	H. annuus	ribosomal protein L16
	Md0973	421	FE969572	Contig 470	1	ABD28456	2e-31	M. truncatula	ribosomal protein S21e
	Md0862 Md0913	684 734	FE969573 FE969574	Contig 5	46	YP_636334	2e-63	E. globulus	ribosomal protein S8
	Md0492	740	FE969575	Contig 54	1	NP_565938	2e-28	A. thaliana	tRNA binding
	Md0823	442	FE969576	Contig 542	1	ABE83172	6e-54	M. truncatula	translation factor
	Md0813	728	FE969577	Contig 552	1	AAL13083	3e-88	P. avium	putative translation-initiation factor 3 subunit
	Md0214	389	FE969578	Contig 67	1	AAN15395	6e-32	A. thaliana	60S ribosomal protein L18A
	Md0080	327	FE969579	S_Contig 16	3	AAF79822	2e-38	A. thaliana	T6D22.2
	Md0944	641	FE969580	S_Contig 2	2	CAC20221	2e-92	G. max	ribosomal protein L2
	Md1102	506	FE969581	S_Contig 9	2	ABH09880	7e-34	P. sativum	eukaryotic translation initiation factor 4E iso
		Secondary metabolism
	Md0117	686	FE969582	Contig 109	1	ABA54866	5e-80	F. sylvatica	putative 3-dehydroquinate synthase
	Md0429	506	FE969583	Contig 120	1	ABE87248	3e-39	M. truncatula	UDP-glucuronosyl/UDP-glucosyltransferase
	Md0254	284	FE969584	Contig 125	1	ABE92230	1e-23	M. truncatula	SAM dependent carboxyl methyltransferase
	Md0169	412	FE969585	Contig 172	2	NP_192425	2e-47	A. thaliana	4-coumarate-CoA ligase/ fatty-acyl-CoA synthase
	Md0164	329	FE969586	Contig 226	1	BAC56854	2e-50	L. corniculatus	squalene synthase
	Md0213	500	FE969587	Contig 51	2	BAF35580	8e-68	K. candel	multifunctional triterpene synthase
	Md1087	526	FE969588	Contig 518	1	AAS10488	2e-22	L. esculentum	methylesterase
	Md0282 Md1037	568 731	FE969589 FE969590	S_Contig 103	2	AAY87903	3e-88	P. ginseng	farnesyl diphosphate synthase
	Md0386	712	FE969591	S_Contig 4	2	AAV74623	7e-68	V. vinifera	homogentisate geranylgeranyl transferase
		Signal transduction
	Md0206	420	FE969592	Contig 102	1	NP_566111	2e-45	A. thaliana	nucleotide binding
	Md0273	728	FE969593	Contig 12	1	BAD21351	1e-19	A. thaliana	IRK-interacting protein
	Md0568	504	FE969594	Contig 134	1	AAL78674	6e-66	M. truncatula	ankyrin-kinase
	Md0220	200	FE969595	Contig 150	1	AAD28617	2e-26	M. sativa	mitogen-activated protein kinase homologue
	Md0385	403	FE969596	Contig 179	2	ABF99312	3e-09	O. sativa	protein kinase family protein
	Md0460	713	FE969597	Contig 23	7	AAF65513	3e-117	C. annuum	GTP-binding protein
	Md0603	239	FE969598	Contig 234	2	AAL58968	2e-09	O. sativa	SRPK4
	Md0120	185	FE969599	Contig 259	1	AAG43551	3e-10	N. tabacum	Avr9/Cf-9 rapidly elicited protein 146
	Md0809	531	FE969600	Contig 279	1	AAD21872	4e-24	P. vulgaris	receptor-like protein kinase homolog RK20-1
	Md0624	632	FE969601	Contig 354	2	NP_564528	7e-84	A. thaliana	RKL1; ATP binding / kinase/ protein serine/threonine kinase
	Md1078	679	FE969602	Contig 417	1	BAB09644	4e-54	A. thaliana	protein kinase-like protein
	Md1079	557	FE969603	Contig 420	1	AAG52471	1e-41	A. thaliana	putative protein kinase
	Md0425	659	FE969604	Contig 49	1	CAA81107	4e-93	P. sativum	phosphoprotein phosphatase 2A 65kDa regulatory subunit
	Md0997	733	FE969605	Contig 502	1	AAO73889	2e-21	A. thaliana	protein kinase family
	Md0856	356	FE969606	Contig 520	1	NP_178731	1e-09	A. thaliana	protein kinase
	Md0881	348	FE969607	Contig 523	1	BAF46308	6e-52	I. nil	leucine-rich repeat transmembrane protein kinase
	Md1117	522	FE969608	Contig 540	1	ABE89183	1e-66	M. truncatula	protein kinase
	Md0846	526	FE969609	Contig 555	1	ABE92804	7e-35	M. truncatula	Curculin-like (mannose-binding) lectin
	Md0645	428	FE969610	Contig 568	1	NP_195034	3e-25	A. thaliana	kinase
	Md0612	727	FE969611	Contig 569	1	ABE93337	5e-116	M. truncatula	protein kinase-like
	Md0639	720	FE969612	Contig 589	1	ABN07953	4e-58	M. truncatula	protein kinase
	Md1070	710	FE969613	S_Contig 13A	1	BAA88636	1e-16	N. tabacum	elicitor-inducible LRR receptor-like protein EILP
	Md0418 Md0280	743 639	FE969614 FE969615	S_Contig 192	7	NP_564066	5e-66	A. thaliana	ATCDPK1; calcium- and calmodulin-dependent protein kinase
	Md0166	566	FE969616	S_Contig 64	2	ABG45945	2e-92	N. tabacum	DSK2
		Transcription
	Md1036	735	FE969617	Contig 10	2	ABE87741	2e-91	M. truncatula	beta-lactamase-like; RNA-metabolising metallo-beta-lactamase
	Md0399	678	FE969618	Contig 117	2	AAC24587	3e-97	P. armeniaca	AP2 domain containing protein
	Md0111	663	FE969619	Contig 121	1	AAT12424	3e-41	M. polymorpha	male-specific transcription factor
	Md0228	628	FE969620	Contig 14	1	AAK59663	8e-59	A. thaliana	putative chromatin remodelling complex ATPase chain ISWI
	Md0556	556	FE969621	Contig 142	1	ABE86980	8e-53	M. truncatula	CCR4-Not complex component, Not1
	Md0178	366	FE969622	Contig 152	5	NP_177683	2e-50	A. thaliana	ATP binding / RNA polymerase II transcription factor
	Md0484	393	FE969623	Contig 170	2	BAD13019	4e-21	O. sativa	putative KH domain protein
	Md0633	415	FE969624	Contig 196	2	BAB10258	4,00E-39	A. thaliana	leucine zipper protein
	Md0186	386	FE969625	Contig 198	1	ABN05926	1e-21	M. truncatula	RNA-binding region RNP-1
	Md0250	493	FE969626	Contig 20	2	AAY26151	1e-21	C. sativus	high mobility group protein
	Md0547	469	FE969627	Contig 223	1	AAR37421	8e-46	V. aestivalis	putative WRKY4 transcription factor
	Md0782	593	FE969628	Contig 274	1	NP_196289	7e-17	A. thaliana	homeobox-leucine zipper protein HAT14 ; DNA binding / transcription factor
	Md0805	637	FE969629	Contig 293	1	AAM13115	2e-61	A. thaliana	putative PHD-type zinc finger protein
	Md0777 Md0900	702 596	FE969630 FE969631	Contig 324	4	Q5RJC5	2e-78	A. thaliana	zinc finger CCCH domain-containing protein ZFN-like 5
	Md1096	708	FE969632	Contig 346	2	ABD72960	2e-38	L. esculentum	GRAS4
	Md0932	750	FE969633	Contig 351	2	ABE87889	3e-79	M. truncatula	RNA-binding region RNP-1 (RNA recognition motif)
	Md0798	584	FE969634	Contig 369	2	NP_193202	7e-68	A. thaliana	DNA-directed RNA polymerase
	Md1355	687	FE969635	Contig 387	2	AAR13699	4e-35	B. oleracea	AP2 transcription factor/ethylene response element
	Md1107	743	FE969636	Contig 396	1	AAR83341	2e-57	P. tomentosa	homeodomain protein HB2
	Md0244	640	FE969637	Contig 40	4	BAA22813	2e-35	N. tabacum	CND41, chloroplast nucleoid DNA binding protein
	Md1148	474	FE969638	Contig 407	1	NP_563946	6e-32	A. thaliana	RNA recognition motif (RRM)-containing protein
	Md0952	676	FE969639	Contig 416	1	ABE93357	1e-37	M. truncatula	RNA-binding region RNP-1 (RNA recognition motif)
	Md1095	337	FE969640	Contig 426	1	AAM34770	6e-22	P. hybrida	nam-like protein 7
	Md0641	623	FE969641	Contig 494	1	AAZ20429	3e-55	M. domestica	MYB6
	Md0226	416	FE969642	Contig 50	1	AAM34773	6e-11	P. hybrida	nam-like protein 10
	Md1082	451	FE969643	Contig 504	1	ABE85991	8e-30	M. truncatula	HMG-I and HMG-Y, DNA-binding
	Md0964	502	FE969644	Contig 547	1	ABE88625	1e-38	M. truncatula	Plus-3
	Md0775	725	FE969645	Contig 556	1	ABI34680	2e-34	G. max	bZIP transcription factor bZIP121
	Md0814	332	FE969646	Contig 561	1	CAA17529	2e-25	A. thaliana	UV-damaged DNA-binding protein-like
	Md0410	722	FE969647	Contig 57	1	AAD55467	4e-132	A. thaliana	putative splicing factor Prp8
	Md0623	572	FE969648	Contig 579	1	BAD53623	1e-41	O. sativa	zinc finger protein-like
	Md0258	643	FE969649	Contig 61	1	AAT38998	5e-40	M. truncatula	AML1
	Md0540	664	FE969650	Contig 94	1	NP_193773	2e-20	A. thaliana	transcription factor jumonji (jmj) family protein / zinc finger (C5HC2 type) family
	Md0468 Md0589	755 622	FE969651 FE969652	S_Contig 12	2	ABF93587	2e-142	O. sativa	THO complex subunit 1, putative
	Md0924	713	FE969653	S_Contig 194	4	ABI23959	3e-51	G. hirsutum	WRKY transcription factor 2
	Md1143	435	FE969654	S_Contig 203	5	ABE82932	7e-20	M. truncatula	HMG-I and HMG-Y, DNA-binding
	Md0571	320	FE969655	S_Contig 209	3	Q38822	1e-16	A. thaliana	auxin-responsive protein IAA3
	Md0025	326	FE969656	S_Contig 49	2	ABC25454	1e-16	S. sogarandinum	zinc finger B-box protein
	Md0986	423	FE969657	S_Contig 99	2	AAB84332	2e-40	A. thaliana	putative small nuclear ribonucleoprotein Prp4p
		Transporters
	Md0249	269	FE969658	Contig 112	4	NP_568230	8e-38	A. thaliana	mechanosensitive ion channel domain-containing protein
	Md0022	652	FE969659	Contig 118	1	ABE81237	3e-62	M. truncatula	xanthine/uracil/vitamin C permease
	Md0462	405	FE969660	Contig 166	1	AAB72177	2e-48	G. hirsutum	vacuolar H+-ATPase subunit E
	Md0106	440	FE969661	Contig 180	1	AAT70233	3e-22	C. bursa-pastoris	cax51
	Md0123	441	FE969662	Contig 227	1	NP_188598	9e-15	A. thaliana	magnesium transporter CorA-like family protein (MRS2-3)
	Md0507	369	FE969663	Contig 239	1	ABB02399	3e-44	Prunus persica	temperature-induced lipocalin
	Md0445	199	FE969664	Contig 254	1	DAA01952	6e-11	A. thaliana	TPA: putative ABC transporter 1
	Md0543	222	FE969665	Contig 262	1	Q2PCF1	4e-18	N. plumbaginifolia	pleiotropic drug resistance protein 2
	Md1437 Md1347	735 719	FE969666 FE969667	Contig 282	22	BAB03052	4e-74	A. thaliana	mitochondrial carrier protein-like
	Md0776	626	FE969668	Contig 318	4	NP_173410	2e-53	A. thaliana	TGD1 (TRIGALACTOSYLDIACYLGLYCEROL 1)
	Md1039	703	FE969669	Contig 350	2	NP_175198	6e-58	A. thaliana	amino acid permease
	Md0929	740	FE969670	Contig 355	2	AAB04557	1e-78	G. hirsutum	delta-tonoplast intrinsic protein
	Md0955	370	FE969671	Contig 365	2	ABF70152	1e-45	M. acuminata	oligopeptide transporter OPT family protein
	Md1068	425	FE969672	Contig 452	1	CAJ84113	2e-52	O. sativa	root uracil permease 1
	Md0931	417	FE969673	Contig 457	1	BAD05827	4e-57	O. sativa	putative PDR-like ABC transporter
	Md1005	731	FE969674	Contig 461	1	NP_179486	3e-45	A. thaliana	AHA1 plasma membrane proton ATPase
	Md1123	684	FE969675	Contig 467	1	AAM19777	3e-82	A. thaliana	ATPase, coupled to transmembrane movement of substances putative ABC transporter
	Md0582	234	FF278133	Contig 566	1	AAX36074	1e-34	N. benthamiana	non-intrinsic ABC protein
	Md0239	701	FE969676	Contig 8	2	NP_180259	2e-84	A. thaliana	ATPase, coupled to transmembrane movement of substances
	Md0480	732	FE969677	Contig 81	2	NP_177218	5e-83	A. thaliana	ATTAP1; ATPase, coupled to transmembrane movement of substances
	Md1101	432	FE969678	S_Contig 204	3	BAB40141	4e-61	P. communis	plasma membrane intrinsic protein 2-1 (aquaporin)
	Md1132	362	FE969679	S_Contig 8	2	AAK01938	6e-58	L. albus	phosphate transporter 1
		REVERSE
		Cell structure
	Md0304	380	FE969680	Contig 36	34	BAB01745	5e-53	A. thaliana	pectinesterase-like protein
	Md0372	404	FE969681	Contig 65	3	CAB81548	6e-33	C. arietinum	putative proline-rich protein APG isolog
	Md0314	334	FE969682	Contig 83	5	NP_199729	2e-34	A. thaliana	enzyme inhibitor/ pectinesterase
		Disease/Defense
	Md0479	534	FE969683	Contig 137	4	Q9M5X7	1e-60	M. domestica	non specific lipid-transfer protein precursor (Allergen Mald 3)
	Md0290	628	FE969684	Contig 15	1	AAQ74889	8e-73	G. hirsutum	Al-induced protein
	Md0683	426	FE969685	Contig 382	2	AAX20917	4e-13	M. domestica	Mal d 1.0109
	Md1327	183	FE969686	Contig 557	1	ABE91531	2e-13	M. truncatula	pathogenesis-related protein Bet v I family, putative
	Md0731	436	FE969687	Contig 591	1	AAP44575	6e-13	S. sogarandinum	25 kDa protein dehydrin
		Energy
	Md1178	365	FE969688	Contig 303	5	CAB46084	2e-32	P. sativum	fructose-1,6-bisphosphatase
	Md1454	470	FE969689	Contig 326	4	P46283	4e-72	A. thaliana	sedoheptulose-1,7-bisphosphatase, chloroplast precursor (SBPase)
	Md1263	699	FE969690	Contig 373	2	Q42919	1e-37	M. sativa	glucose-6-phosphate 1-dehydrogenase, cytoplasmic isoform
	Md1189	618	FE969691	Contig 413	1	CAB79508	6e-40	A. thaliana	fructose-bisphosphate aldolase-like protein
	Md0727	380	FE969692	Contig 451	1	CAA42623	7e-24	N. sylvestris	photosystem I reaction center subunit II, chloroplast precursor
	Md1255	232	FE969693	Contig 514	1	BAA96364	5e-15	B. gymnorhiza	oxygen evolving enhancer protein 2
	Md0687	531	FE969694	Contig 522	1	AAD33596	3e-46	H. brasiliensis	thioredoxin h
	Md1292	760	FE969695	Contig 89	13	Q41387	4e-21	S. oleracea	photosystem II reaction center W protein, chloroplast precursor (PSII 6.1 kDa protein)
	Md0906	353	FE969696	S_Contig 213	5	AAM13033	8e-22	A. thaliana	ferredoxin precursor
		Intracellular traffic
	Md1251	530	FE969697	Contig 334	3	ABE92213	2e-53	M. truncatula	SecA protein
	Md0312 Md0346	716 715	FE969698 FE969699	S_Contig 178	38	CAA98160	3e-78	L. japonicus	RAB1C
	Md0363 Md1185	724 751	FE969700 FE969701	S_Contig 208	6	ABC01915	3e-115	S. tuberosum	vacuolar sorting receptor protein PV72-like protein
		Metabolism
	Md0722	629	FE969702	Contig 273	2	AAM64916	8e-84	A. thaliana	putative GDSL-motif lipase/acylhydrolase
	Md0691	477	FE969703	Contig 366	2	NP_176647	1e-62	A. thaliana	Cys/Met metabolism
	Md1304	368	FE969704	Contig 429	1	CAC88762	4e-12	N. tabacum	serine acetyltransferase 1
	Md1258	453	FE969705	Contig 492	1	NP_188316	2e-47	A. thaliana	AMP binding / acetate-CoA ligase
	Md0353	544	FE969706	Contig 53	5	AAR21278	7e-11	Zea mays	fatty aldehyde dehydrogenase 1
	Md1275	707	FE969707	Contig 575	1	ABE94613	1e-92	M. truncatula	plant neutral invertase
	Md1334	738	FE969708	Contig 577	1	NP_565841	3e-51	A. thaliana	catalytic/ hydrolase
	Md1300	678	FE969709	Contig 588	1	NP_189051	1e-46	A. thaliana	glutamine-fructose-6-phosphate transaminase (isomerizing)/ sugar binding / transaminase
	Md1323	593	FE969710	Contig 598	1	AAS75127	1e-62	A. americana	GSDL-motif lipase
		Protein destination and storage
	Md0732 Md0750	638 713	FE969711 FE969712	Contig 320	4	AAT78803	2e-71	O. sativa	putative endoplasmic reticulum oxidoreductin
	Md1310	439	FE969713	Contig 340	3	NP_913977	6e-56	O. sativa	putative TPA: Cgi67 serine protease precursor
	Md0762	506	FE969714	Contig 368	2	NP_564462	2e-14	A. thaliana	ATPDIL5-2; electron transporter/ thiol-disulfide exchange intermediate
	Md1320	543	FE969715	Contig 370	2	NP_563883	2e-12	A. thaliana	protein binding / ubiquitin-protein ligase/ zinc ion binding
	Md0330 Md0343	731 698	FE969716 FE969717	Contig 4	3	NP_567918	5e-113	A. thaliana	D-alanyl-D-alanine endopeptidase
	Md0768	535	FE969718	Contig 415	1	AAD22992	4e-70	A. thaliana	F-box protein ORE9,
	Md1271	689	FE969719	Contig 532	1	AAP86669	1e-59	A. thaliana	26S proteasome subunit RPN9b
	Md0381 Md1168	716 738	FE969720 FE969721	Contig 6	3	ABA98280	6e-140	O. sativa	ubiquitin-specific protease 12, putative, expressed
		Protein synthesis
	Md0708	540	FE969722	Contig 339	3	AAB08726	2e-47	G. hirsutum	ribosomal protein L44 isoform a
	Md1297	664	FE969723	Contig 358	2	BAC10193	2e-52	O. sativa	putative 40S ribosomal protein S6
	Md1278	392	FE969724	S_ Contig 100A	3	AAA34039	3e-33	S. oleracea	ribosomal protein 30S subunit
		Secondary metabolism
	Md1299	338	FE969725	Contig 567	1	AAV87156	5e-21	L. hirsutum	MKS1
		Signal transduction
	Md0320	716	FE969726	Contig 17	1	NP_194269	9e-27	A. thaliana	ATP binding / kinase/ protein kinase/ protein serine/threonine
	Md1309 Md0680	747 715	FE969727 FE969728	Contig 332	3	ABE77483	3e-22	M. truncatula	IQ calmodulin-binding region
	Md0681	526	FE969729	Contig 400	1	AAG25726	2e-66	P. balsamifera	phytochrome B2
	Md0729	541	FE969730	Contig 401	1	BAD35990	5e-63	O. sativa	putative receptor protein kinase
	Md0694	677	FE969731	Contig 409	1	NP_001045548	2e-107	O. sativa	putative protein kinase
	Md0747	428	FE969732	Contig 423	1	AAM62636	3e-11	A. thaliana	putative PRL1 associated protein
	Md1272	345	FE969733	Contig 430	1	BAB88944	1e-24	M. crystallinum	protein phosphatase 2C
	Md1195	556	FE969734	Contig 444	1	AAD21721	1e-09	A. thaliana	putative MAP kinase
	Md0757	723	FE969735	Contig 449	1	AAM63076	2e-69	A. thaliana	2A phosphatase associated protein of 46 kD
		Transcription
	Md0323 Md1180	723 740	FE969736 FE969737	Contig 18	6	AAM66970	1e-74	A. thaliana	putative RNA-binding protein
	Md0341	545	FE969738	Contig 31	9	BAE71241	4e-22	T. pratense	putative Argonaute protein
	Md0369	673	FE969739	Contig 42	1	CAC01237	8e-50	N. plumbaginifolia	RNA Binding Protein 45
	Md0359	614	FE969740	S_Contig 206	6	BAB88859	2e-50	N. tabacum	putative multiprotein bridging factor 1
		Transporters
	Md0357	393	FE969741	Contig 127	2	CAB51175	9e-12	A. thaliana	copper transporter protein homolog
	Md0699	700	FE969742	Contig 353	2	Q10710	1e-78	R. communis	sugar carrier protein A
	Md0706	742	FE969743	Contig 371	2	ABF70152	2e-55	M. acuminata	oligopeptide transporter OPT family protein
	Md0730	673	FE969744	Contig 456	1	AAO73433	7e-74	C. limon	vacuolar membrane ATPase subunit c
	Md0697	379	FE969745	Contig 531	1	CAG29369	5e-22	Z. mays	vacuolar H+-translocating inorganic pyrophosphatase
		FOR&REV
		Cell structure
	Md0756	668	FE969746	Contig 356	2	AAC17058	7e-55	A. thaliana	contains similarity to Kinesin-like protein C gb|D21138
	Md0124	336	FE969747	S_Contig 211	5	BAA96447	2e-24	P. pyrifolia	glycine rich protein
		Disease/Defense
	Md0151	278	FE969748	Contig 135	3	ABF29697	3e-10	P. suaveolens	late embryogenesis abundant protein 5
	Md0752	427	FE969749	S_Contig 205	8	O24059	1e-24	M. domestica	metallothionein-like protein type 3
		Energy
	Md0760	316	FE969750	Contig 367	3	Q40281	3e-54	M. domestica	ribulose bisphosphate carboxylase/oxygenase activase, chloroplast precursor
	Md0271	730	FE969751	S_Contig 193	12	P08926	4e-93	P. sativum	RuBisCO large subunit-binding protein subunit alpha
		Protein destination and storage
	Md0585	705	FE969752	Contig 285	4	ABI84264	2e-64	A. hypogaea	ubiquitin-conjugating enzyme
	Md0535	643	FE969753	Contig 48	5	NP_187503	9e-39	A. thaliana	heat shock protein binding / unfolded protein binding
		Signal transduction
	Md1197	671	FE969754	S_Contig 201	8	ABE81436	6e-60	M. truncatula	protein kinase C conserved region 2
		Transcription
	Md1085	614	FE969755	S_Contig 161	4	AAM65307	4e-11	A. thaliana	transfactor, putative
	Md0741 Md1338	1208	FE969756 FE969757	S_Contig 89	4	ABK35086	8e-56	P. persica	EIL2
	For each unigene, indicated as contig (4), the results of BLASTX are reported as the Best matching sequence from the database(9), the ID (6), the e-value (7) and the Source of matching sequence (8). N (5) indicates the number of clones assembled in a contig. The sigle pass sequences covering the entire lenght of each contig (one to three) are identified with the User_Id (1) and the GenBank access…
